# Supplementary material for: Enhanced driving force and charge separation efficiency of protonated anthraquinone for C–H photooxygenation of alkanes by proton-coupled electron transfer
Source: Royal Society of Chemistry journal article supplement (doi:10.1039/d2gc04673c), 2023-01-01
Supplement: d2gc04673c1.pdf [file d2gc04673c1.pdf]

## Supporting Information

### Enhanced driving force and charge separation efficiency of protonated anthraquinone for C-H photooxygenation of alkane by proton-coupled electron transfer

*Hui Yin, Yingying Yuan, Yangbin Li, Jing Tang, Wenzhou Zhong\* and Liqiu Mao\**

National & Local United Engineering Laboratory for New Petrochemical Materials & Fine

Utilization of Resources, Key Laboratory of Chemical Biology Traditional Chinese Medicine

Reserach Ministry of Education, College of Chemistry and Chemical Engineering, Hunan Normal

University, Changsha 410081, P. R.

#### Table of Contents

|                                                                                   |            |
|-----------------------------------------------------------------------------------|------------|
| <b>I. Effects of different photocatalytic reaction conditions</b>                 | <b>S2</b>  |
| <b>II. Comparison of the results of cyclohexane photooxidation and references</b> | <b>S3</b>  |
| <b>III. Self-assembly photo-reactor used in this study</b>                        | <b>S5</b>  |
| <b>IV. Effect of HCl/ethylAQs on photocatalytic reaction</b>                      | <b>S6</b>  |
| <b>V. UV-Vis spectra of the samples</b>                                           | <b>S7</b>  |
| <b>VI. Cyclic voltammograms (CVs) of the samples.</b>                             | <b>S8</b>  |
| <b>VII. Electronic properties of AQ and 2-ethylAQ-H<sub>3</sub>PO<sub>4</sub></b> | <b>S9</b>  |
| <b>VIII. Calculated UV-Vis spectra of 2-ethylAQ in different solvents</b>         | <b>S10</b> |

**Table S1** Effects of different solvents on the photocatalytic reactions

| Entry | Solvent         | Conv. (%) | Sele. (%)                                                                         |                                                                                    |                                                                                     |
|-------|-----------------|-----------|-----------------------------------------------------------------------------------|------------------------------------------------------------------------------------|-------------------------------------------------------------------------------------|
|       |                 |           | 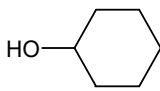 |  |  |
| 1     | Acetonitrile    | 8.9       | 28.9                                                                              | 46.9                                                                               | 24.2                                                                                |
| 2     | Ethanol         | 3.2       | 40.4                                                                              | 39.2                                                                               | 20.4                                                                                |
| 3     | Acetone         | 36.2      | 18.9                                                                              | 80.2                                                                               | 0.8                                                                                 |
| 4     | Ethyl acetate   | 4.2       | 37.9                                                                              | 40.5                                                                               | 21.6                                                                                |
| 5     | Benzene         | 10.7      | 12.6                                                                              | 52.6                                                                               | 34.8                                                                                |
| 6     | Benzonitrile    | 8.2       | 81.3                                                                              | 9.9                                                                                | 8.8                                                                                 |
| 7     | Dichloromethane | 7.6       | 66.2                                                                              | 0.5                                                                                | 33.3                                                                                |
| 8     | DMF             | 0.8       | 38.3                                                                              | 15.3                                                                               | 46.4                                                                                |

Reaction conditions: 1.2 mmol cyclohexane, 0.1 mmol 2-ethylAQ photocatalyst, 5 mL solvent, 0.06 mL concentrated hydrochloric acid additive (0.7 mmol HCl), 35W tungsten–bromine lamp ( $\lambda > 400$  nm), O<sub>2</sub> (0.1 MPa), at about 20 °C 24 h.

**Table S2** Effects of the reaction times on the photocatalytic reactions

| Entry | t (min) | Conv. (%) | Sele. (%)                                                                           |                                                                                      |                                                                                       |
|-------|---------|-----------|-------------------------------------------------------------------------------------|--------------------------------------------------------------------------------------|---------------------------------------------------------------------------------------|
|       |         |           | 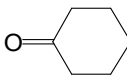 |  |  |
| 1     | 20      | 1.0       | 22.6                                                                                | 77.2                                                                                 | 0.3                                                                                   |
| 2     | 40      | 1.1       | 15.7                                                                                | 83.5                                                                                 | 0.8                                                                                   |
| 3     | 60      | 1.4       | 49.2                                                                                | 45.7                                                                                 | 5.1                                                                                   |
| 4     | 90      | 1.9       | 55.6                                                                                | 37.9                                                                                 | 6.5                                                                                   |
| 5     | 120     | 2.6       | 49.3                                                                                | 49.1                                                                                 | 1.6                                                                                   |

Reaction conditions: 1.2 mmol cyclohexane, 0.1 mmol 2-ethylAQ photocatalyst, 5 mL solvent, 0.06 mL concentrated hydrochloric acid additive (0.7 mmol HCl), 35W tungsten–bromine lamp ( $\lambda > 400$  nm), O<sub>2</sub> (0.1 MPa), at about 20 °C.

**Table S3** Comparison of the results of oxidation reaction of cyclohexane under different photooxidation systems

| Entry              | Catalyst                                  | Oxidant/<br>(MPa)             | T (°C) | t (h) | Solvent          | Conv.<br>(%) | KA-oil<br>Sele. (%) | Ref.      |
|--------------------|-------------------------------------------|-------------------------------|--------|-------|------------------|--------------|---------------------|-----------|
| 1 <sup>a, h</sup>  | 5%-VOSO <sub>4</sub> -HTS                 | O <sub>2</sub> (0.1)          | 36,    | 6     | MeCN             | 14.5         | 94.0                | [1]       |
| 2 <sup>b</sup>     | Fe <sub>0.2</sub> Ti <sub>0.02</sub> -SBA | O <sub>2</sub> (0.25)         | rt.    | 48    | MeCN             | 2.3          | >99                 | [2]       |
| 3 <sup>c</sup>     | NH <sub>2</sub> -M125/P25-4               | O <sub>2</sub> (0.1)          | 25     | 5     | MeCN             | 0.7          | 99                  | [3]       |
| 4 <sup>c</sup>     | N-TiO <sub>2</sub> -3                     | O <sub>2</sub> (0.1)          | 25     | 7     | CCl <sub>4</sub> | 0.1          | 100                 | [4]       |
| 5 <sup>d</sup>     | WO <sub>3</sub> NCs-AgNPs                 | TBHP                          | rt.    | 48    | None             | 40.2         | 97.0                | [5]       |
| 6 <sup>e</sup>     | Cu-40min/a-C <sub>3</sub> N <sub>4</sub>  | H <sub>2</sub> O <sub>2</sub> | 60     | 4     | MeCN             | 88.0         | 95                  | [6]       |
| 7 <sup>f</sup>     | WO <sub>3</sub> -NCDs                     | Air (1.5)                     | 120    | 8     | Acetone          | 7.9          | 98.9                | [7]       |
| 8 <sup>f</sup>     | MoO <sub>3</sub> -Ag80                    | Air (1.5)                     | 120    | 8     | Acetone          | 8.6          | 99                  | [8]       |
| 9 <sup>g, i</sup>  | BiOI                                      | Air (0.1)                     | rt.    | 3     | None             | <0.1         | 98.8                | [9]       |
| 10 <sup>f, h</sup> | VOCl <sub>2</sub>                         | O <sub>2</sub> (0.1)          | 30     | 4     | MeCN             | 23.3         | 97.0                | [10]      |
| 11 <sup>a, h</sup> | V <sup>IV</sup> OQ <sub>2</sub>           | O <sub>2</sub> (0.1)          | 30     | 10    | MeCN             | 18.7         | 86                  | [11]      |
| 12 <sup>a, h</sup> | 2-EthylAQ                                 | O <sub>2</sub> (0.1)          | rt.    | 24    | Acetone          | 36.2         | 99.8                | This work |
| 13 <sup>a, j</sup> | 2-EthylAQ                                 | O <sub>2</sub> (0.1)          | rt.    | 10    | Acetone          | 24.9         | 100                 | This work |

<sup>a</sup> 35 W bromine tungsten lamp; <sup>b</sup> solar simulator ( $\lambda > 300$  nm, 1.5 AM); <sup>c</sup> 300 W Xenon lamp ( $\lambda \geq 420$  nm); <sup>d</sup> 220 W Xenon lamp; <sup>e</sup> 400 W Xenon lamp ( $\lambda \geq 420$  nm); <sup>f</sup> 300 W Xenon lamp; <sup>g</sup> 400 W metal halide lamp; <sup>h</sup> HCl as additive; <sup>i</sup> water as additive; <sup>j</sup> KH<sub>2</sub>PO<sub>4</sub> as additive;

## References

- [1] W. Zhong, T. Qiao, J. Dai, L. Mao, Q. Xu, G. Zou, X. Liu, D. Yin, and F. Zhao, Visible-light-responsive sulfated vanadium-doped TS-1 with hollow structure: Enhanced photocatalytic activity in selective oxidation of cyclohexane, *J. Catal.*, 2015, **330**, 208-221. <https://doi.org/10.1016/j.jcat.2015.06.013>.
- [2] Y. Ide, M. Iwata, Y. Yagenji, N. Tsunoji, M. Sohmiya, K. Komaguchi, T. Sano and Y. Sugahara, Fe oxide nanoparticles/Ti-modified mesoporous silica as a photo-catalyst for efficient and selective cyclohexane conversion with O<sub>2</sub> and solar light, *J. Mater. Chem. A*, 2016, **4**, 15829-15835. <https://doi.org/10.1039/c6ta04222h>.
- [3] X. Zhao, Y. Zhang, P. Wen, G. Xu, D. Ma and P. Qiu, NH<sub>2</sub>-MIL-125(Ti)/TiO<sub>2</sub> composites as superior visible-light photocatalysts for selective oxidation of cyclohexane, *Mol. Catal.*, 2018, **452**, 175-183. <https://doi.org/10.1016/j.mcat.2018.04.004>.
- [4] G. Xu, Y. Zhang, D. Peng, D. Sheng, Y. Tian, D. Ma and Y. Zhang, Nitrogen-doped mixed-phase TiO<sub>2</sub> with controllable phase junction as superior visible-light photocatalyst for selective oxidation of cyclohexane, *Appl. Surf. Sci.*, 2021, **536**, 147953-147964, <https://doi.org/10.1016/j.apsusc.2020.147953>.
- [5] Y. Xiao, J. Liu, J. Mai, C. Pan, X. Cai and Y. Fang, High-performance silver nanoparticles coupled with monolayer hydrated tungsten oxide nanosheets: The structural effects in photocatalytic oxidation of cyclohexane, *J. Colloid. Interface Sci.*, 2018, **516**, 172-181. <https://doi.org/10.1016/j.jcis.2018.01.057>.
- [6] A. Shahzeydi, M. Ghiaci, H. Farrokhpour, A. Shahvar, M. Sun and M. Saraji, Facile and green synthesis of copper nanoparticles loaded on the amorphous carbon nitride for the oxidation of cyclohexane, *Chem. Eng. J.*, 2019, **370**, 1310-1321. <https://doi.org/10.1016/j.cej.2019.03.227>.

- 
- [7] J. Zhang, J. Liu, X. Wang, J. Mai, W. Zhao, Z. Ding and Y. Fang, Construction of Z-scheme tungsten trioxide nanosheets-nitrogen-doped carbon dots composites for the enhanced photothermal synergistic catalytic oxidation of cyclohexane, *Appl. Catal. B Environ.*, 2019, **259**, 118063, <https://doi.org/10.1016/j.apcatb.2019.118063>.
- [8] X. Wang, Z. Feng, J. Liu, Z. Huang, J. Zhang, J. Mai and Y. Fang, In-situ preparation of molybdenum trioxide-silver composites for the improved photothermal catalytic performance of cyclohexane oxidation, *J. Colloid Interface Sci.*, 2020, **580**, 377-388, <https://doi.org/10.1016/j.jcis.2020.07.015>.
- [9] D. Contreras, V. Melin, K. Márquez, G. Pérez-González, H. D. Mansilla, G. Pecchi and A. Henríquez, Selective oxidation of cyclohexane to cyclohexanol by BiOI under visible light: Role of the ratio (1 1 0)/(0 0 1) facet, *Appl. Catal. B Environ.*, 2019, **251**, 17-24, <https://doi.org/10.1016/j.apcatb.2019.03.058>.
- [10] Y. Wan, Q. Guo, K. Wang and X. Wang, Efficient and selective photocatalytic oxidation of cyclohexane using O<sub>2</sub> as oxidant in VOCl<sub>2</sub> solution and mechanism insight, *Chem. Eng. Sci.*, 2019, **203**, 163-172, <https://doi.org/10.1016/j.ces.2019.03.079>.
- [11] J. She, X. Lin, Z. Fu, J. Li, S. Tang, M. Lei, X. Zhang, C. Zhang and D. Yin, HCl and O<sub>2</sub> co-activated bis(8-quinolinolato) oxovanadium (iv) complexes as efficient photoactive species for visible light-driven oxidation of cyclohexane to KA oil, *Catal. Sci. Tech.*, 2019, **9**, 275-285, <https://doi.org/10.1039/c8cy01241e>.

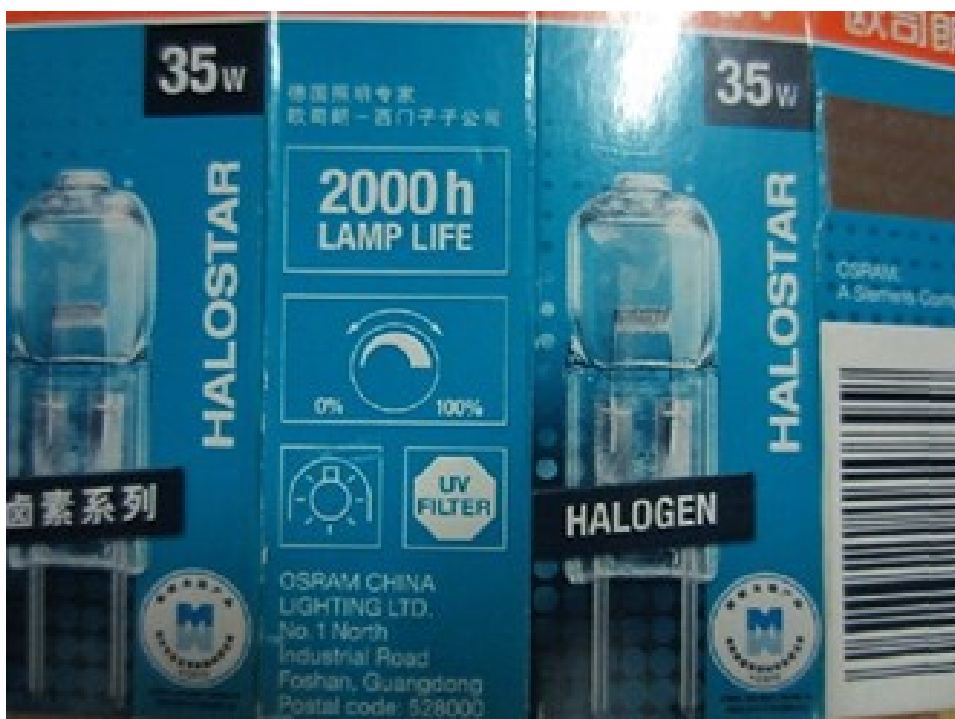

**Figure S1** Photograph of the package box of lamp (which the instruction of lamp's package box clearly shows that the UV light has been filtered).

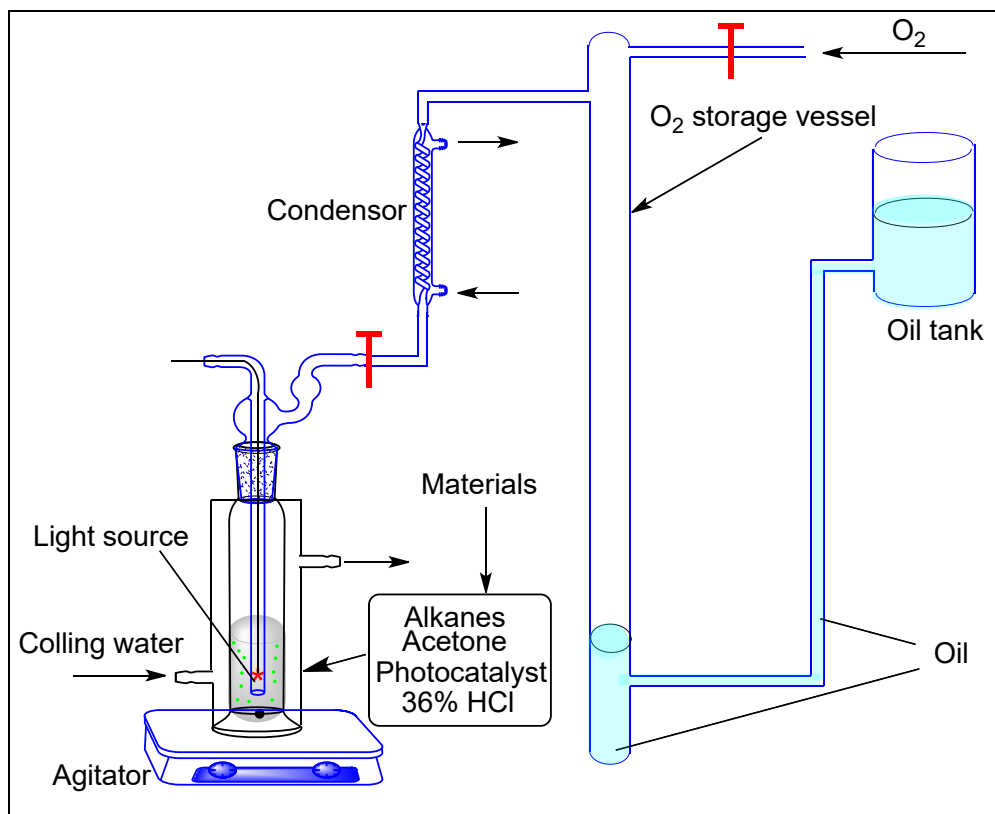

**Figure S2** Self-assembly photo-reactor used in this study.

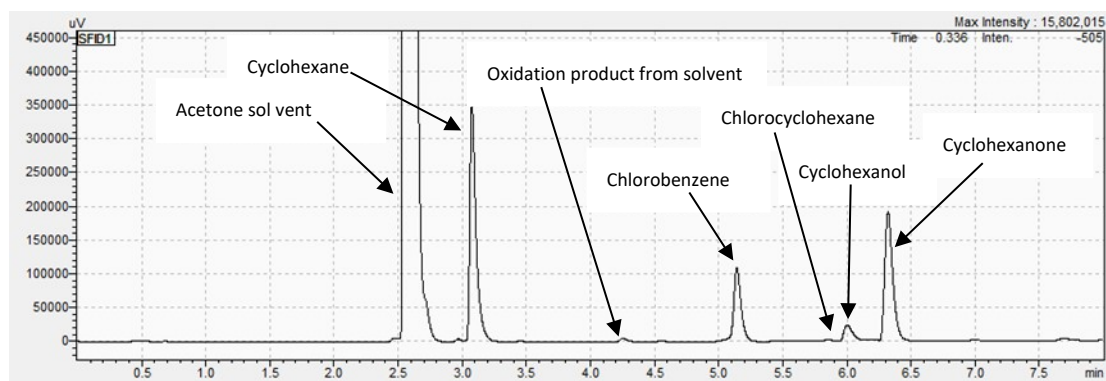

**Figure S3** Gas chromatogram of product distribution

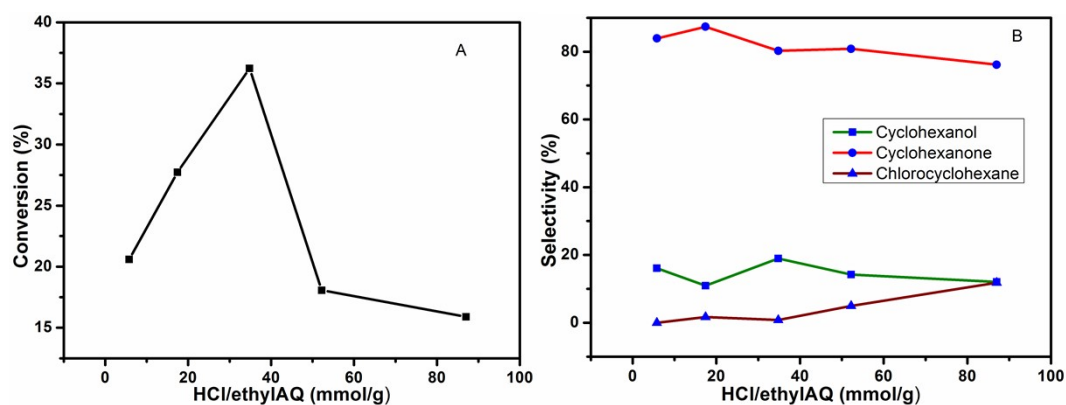

**Figure S4** Effect of HCl/ethylAQs on photocatalytic reaction.

Reaction conditions: 1.2 mmol cyclohexane, 0.1 mmol 2-ethylAQ photocatalyst, 5mL acetone, 0.06 mL concentrated hydrochloric acid additive (0.7 mmol HCl), 35 W tungsten–bromine lamp ( $\lambda > 400$  nm),  $O_2$  (0.1 MPa), at about 20 °C. 24 h.

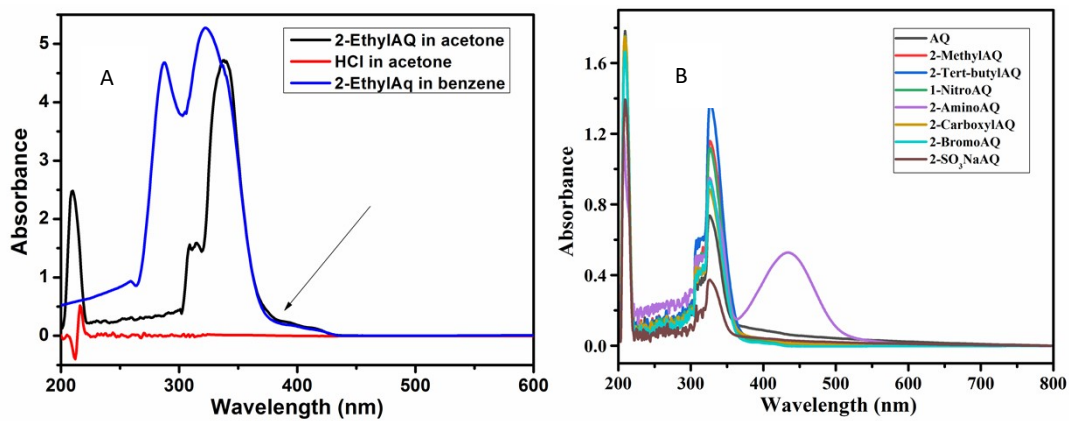

**Figure S5** UV-Vis spectra of 2-ethylAQ or HCl (A) and other AQ derivatives (B).

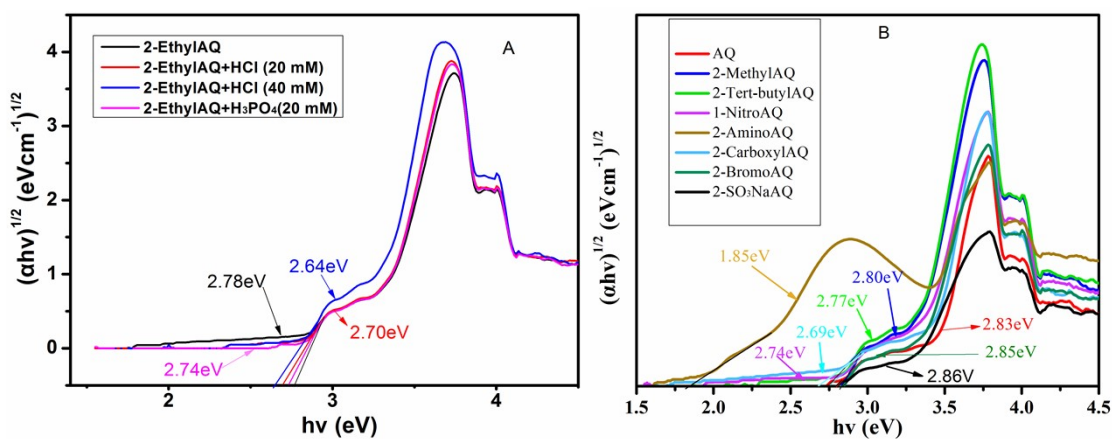

**Figure S6** Tauc plots from UV-Vis spectra of 2-ethylAQ with acids (A) and other AQ derivatives (B).

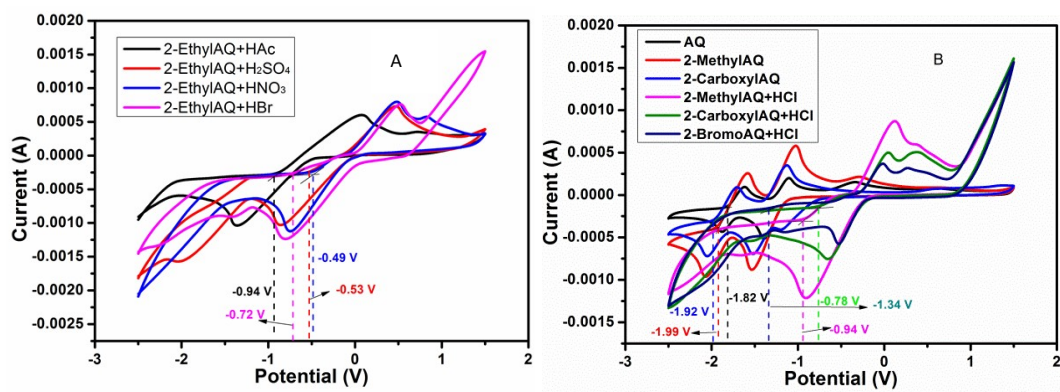

**Figure S7** Cyclic voltammograms (CVs) of ethylAQ+acids (A) and other AQ derivatives (B) in acetone.



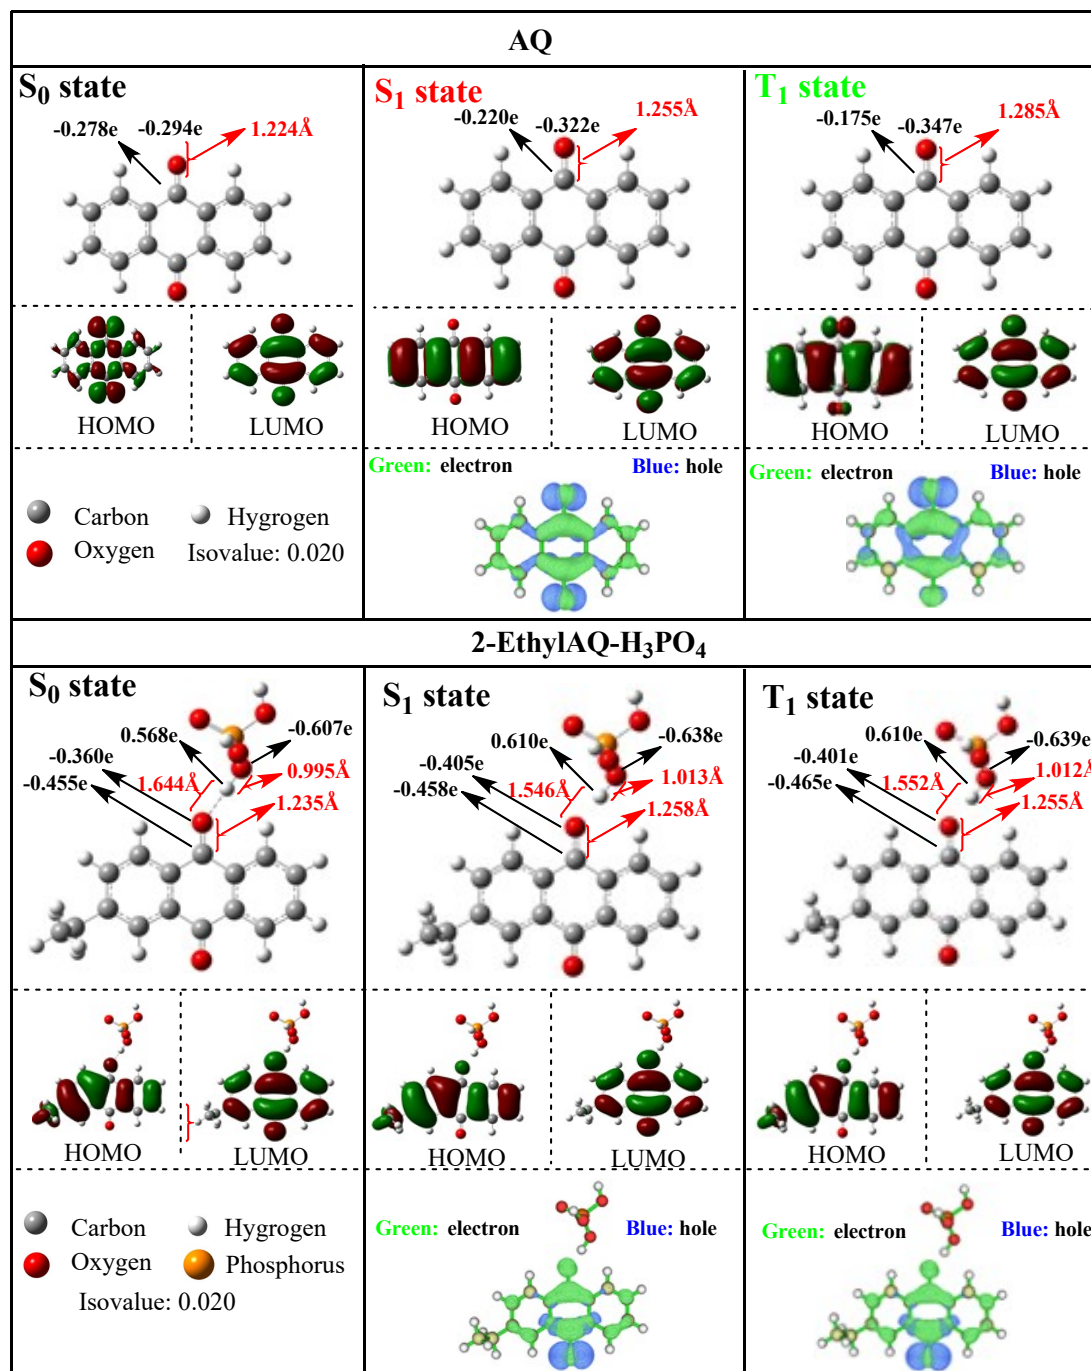

**Figure S8** Electronic properties of optimized AQ and 2-ethylAQ-H<sub>3</sub>PO<sub>4</sub> structures in the S<sub>0</sub>, S<sub>1</sub> and T<sub>1</sub> states

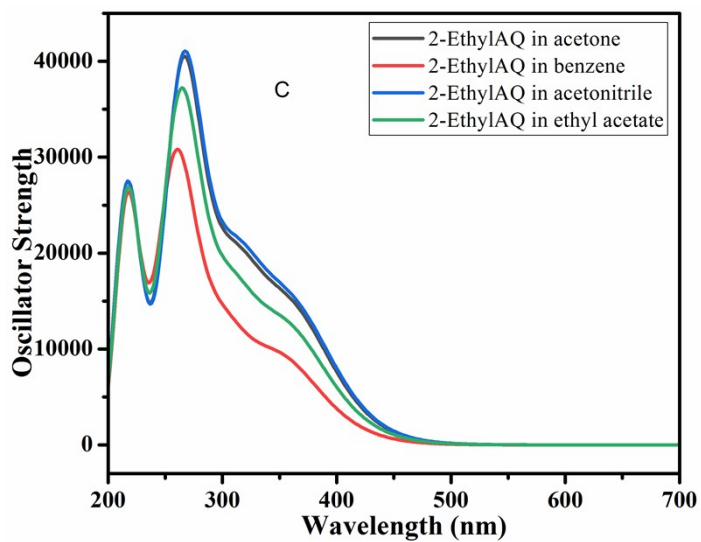

Figure S9 Calculated UV-Vis spectra of 2-ethylAQ in different solvents
